# Supplementary material for: BMP4 and Gremlin 1 regulate hepatic cell senescence during clinical progression of NAFLD/NASH
Source: Springer Nature journal article supplement (doi:10.1038/s42255-022-00620-x), 2022-08-22
Supplement: MOESM1 [file 42255_2022_620_MOESM1_ESM.pdf]

**Supplementary information**

---

**BMP4 and Gremlin 1 regulate hepatic cell senescence during clinical progression of NAFLD/NASH**

---

In the format provided by the authors and unedited

# 1 Supplementary Figures

Supplementary Figure 1

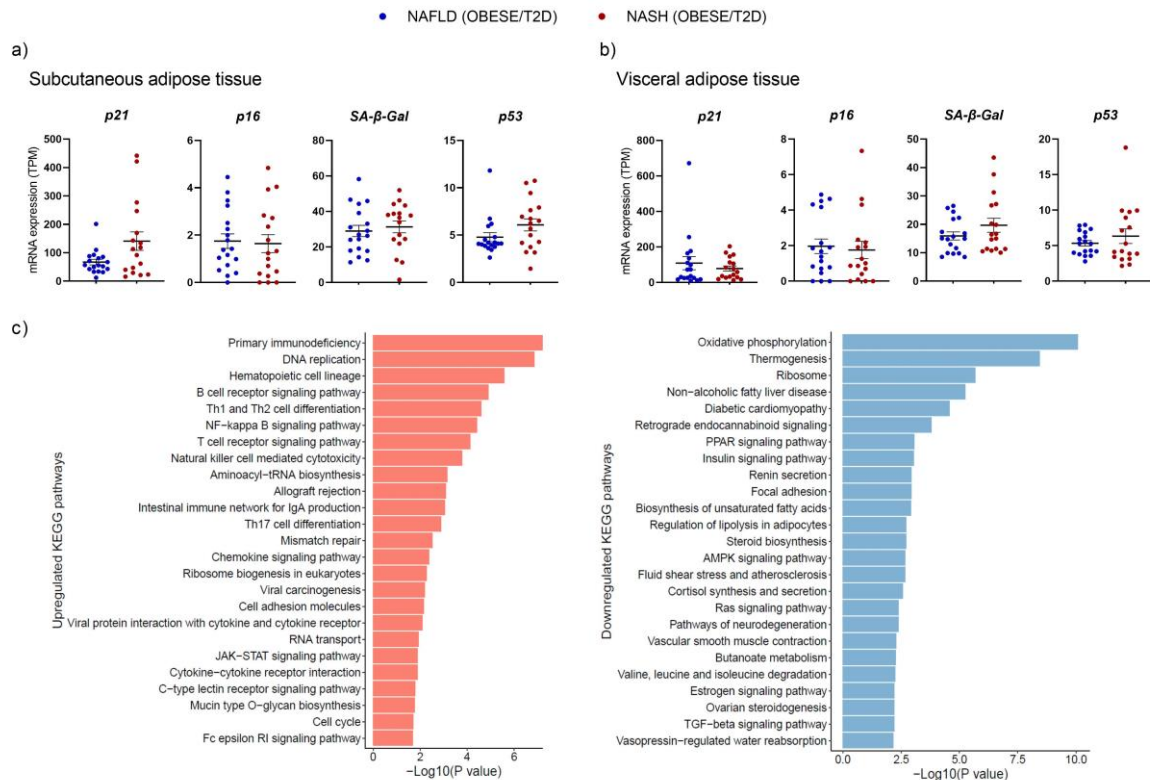

2

3 **Supplementary Figure 1:** (a, b) Expression of senescence markers (*p21*, *p16*, *SA-β-Gal* and  
 4 *p53*) in subcutaneous (a) and visceral adipose (b) tissue of NAFLD (n=18) and NASH (n = 17)  
 5 individuals. RNA-seq data are shown as transcripts per million (TPM). Values are mean ± SEM.  
 6 Statistics were calculated using 2-tailed, unpaired t-test or Mann-Whitney test. (c) KEGG  
 7 pathway enrichment analysis of differentially expressed upregulated and downregulated genes  
 8 from visceral adipose tissue of NAFLD and NASH individuals. Two-tailed p-values in distinct-  
 9 directional class (up-regulation or down-regulation) were calculated from a theoretical null-  
 10 distribution by using R package "piano".  $p < 0.05$  was considered to indicate a statistically  
 11 significant difference.

Supplementary Figure 2

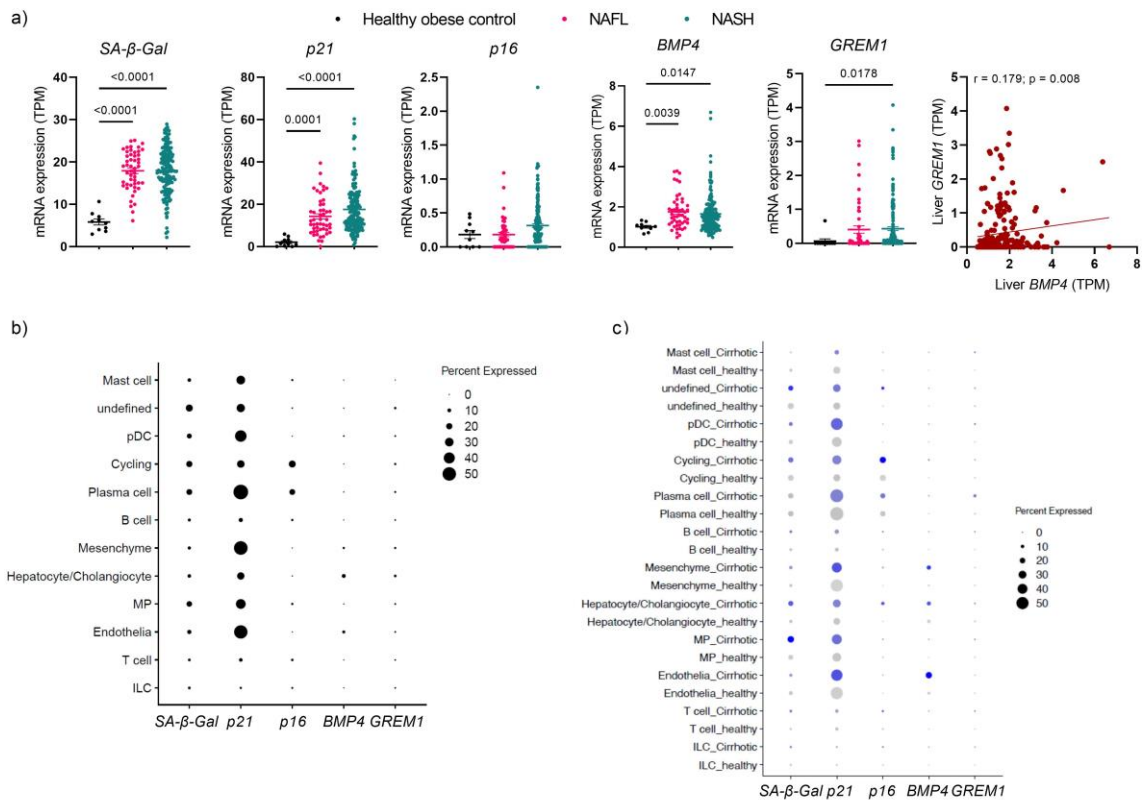

12

13

14 **Supplementary Figure 2:** (a) Hepatic expression levels of senescence markers (*p21*, *p16*, *SA-*  
15 *β-Gal*), *BMP4* and *GREM1* in healthy obese (n = 10), NAFL (n = 50) and NASH (n = 155)  
16 individuals (publicly available dataset<sup>61</sup>). RNA-seq data are shown as transcripts per million  
17 (TPM). Values are mean ± SEM. Statistical significance was determined by one-way ANOVA  
18 with *post-hoc* Tukey's test or Kruskal-Wallis with *post-hoc* Dunn's test. (b, c) Gene expression  
19 analysis of publicly available scRNA-seq dataset<sup>30</sup>: Expression of indicated genes across the  
20 11 cell types in healthy liver samples (b), as well as in cirrhotic liver samples (along with  
21 expression in healthy liver samples) (c). The size of the dot corresponds to the percentage of  
22 cells expressing the gene in each cell type, the color represents the average expression level.  
23 MP, mononuclear phagocyte; pDC, plasmacytoid dendritic cell; ILC, innate lymphoid cell.

24

25

26

27

**Graphical abstract**

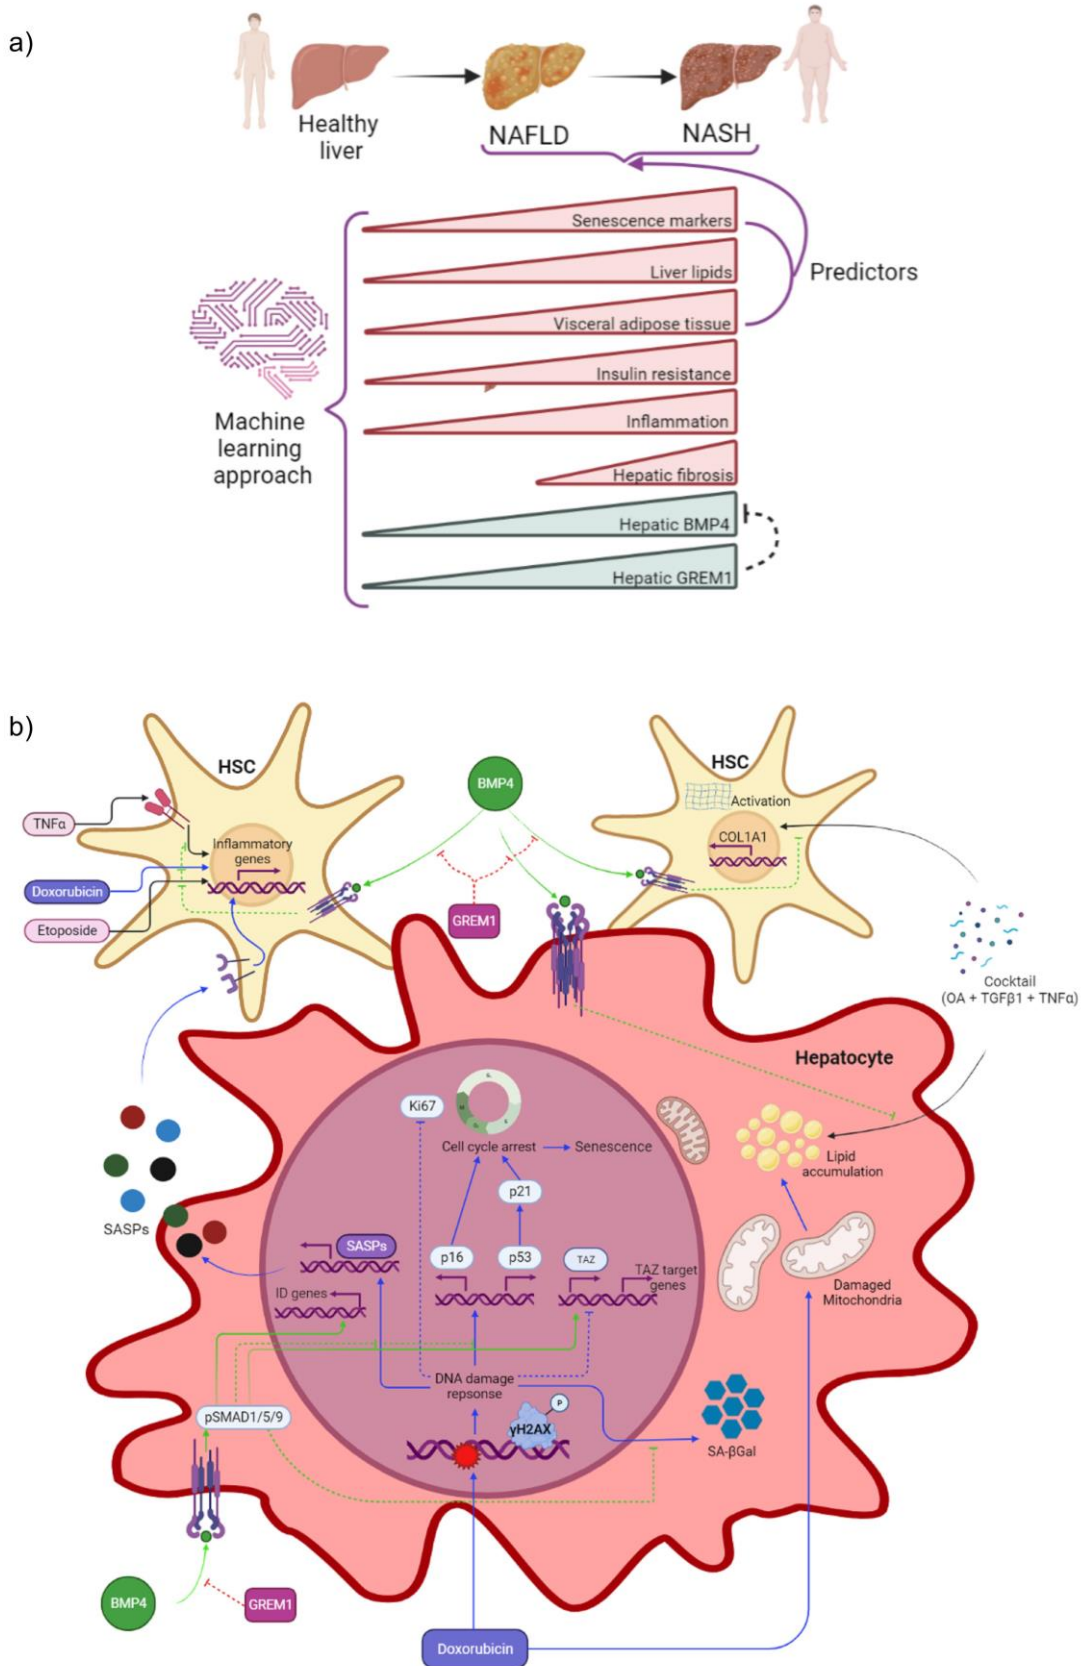

30 **Supplementary Figure 3: Graphical abstract shows increased hepatic senescence in**  
31 **NAFLD/NASH and identified mechanisms of BMP4 (and GREM1) against doxorubicin-**  
32 **induced senescence.** (a) Senescence markers are increased in the liver of NAFLD/NASH  
33 patients with increasing severity of disease. Their increase is closely associated with increase  
34 in liver lipids, visceral adipose tissue, insulin resistance, inflammation as well as hepatic  
35 fibrosis. Additionally, increase in hepatic BMP4 and its antagonist GREM1 is also associated  
36 with increase in hepatic senescence markers. Interestingly, Machine-Learning approach  
37 identifies senescence markers, amount of visceral adipose tissue and GREM1 expression as  
38 important predictors of disease development. (b) In vitro model system showing human  
39 hepatocytes undergo senescence in response to doxorubicin, a DNA-damaging agent.  
40 Mechanistically, doxorubicin leads to increase in  $\gamma$ H2AX as a result of DNA-damage, which in  
41 turn activates the p53-p21 and the p16 pathways, driving cell cycle arrest (reduces Ki67) and  
42 senescence (increases SA- $\beta$ Gal activity). Doxorubicin also triggers TAZ downregulation, trans-  
43 activating the p53-p21 pathway. Additionally, doxorubicin induces mitochondrial damage  
44 leading to reduced oxidation and lipid accumulation as well as enhanced SASPs secretion in  
45 hepatocytes resulting in increased expression of inflammatory genes in hepatic stellate cells  
46 (HSCs). Intriguingly, BMP4 is antagonistic to the doxorubicin-mediated increase in p53 & p16,  
47 reduces expression of pro-inflammatory cytokines and enhances TAZ and its target genes in  
48 hepatocytes. BMP4 also prevents lipid accumulation in hepatocytes exposed to a cocktail of  
49 lipogenic & inflammatory triggers. HSCs, playing a key role in liver fibrosis, increases fibrotic  
50 markers (COL1A1 &  $\alpha$ SMA) when exposed to TGF $\beta$ 1, or increases pro-inflammatory markers  
51 when exposed to inflammatory triggers (e.g.; TNF $\alpha$ ) or senescence-inducing agents  
52 (doxorubicin or etoposide). BMP4 reduces both fibrotic as well as inflammatory markers in  
53 HSCs exposed to different insults. GREM1, on the other hand, works via inhibiting BMP4-  
54 SMAD signaling that results in downregulation of its downstream *Id* genes. GREM1 promotes  
55 senescence in hepatocytes and prevents the anti-inflammatory effects of BMP4 in HSCs.

56 Solid lines with arrows represent activation and dotted lines represent inhibition. Blue lines  
57 indicate the effects of doxorubicin, green lines indicate the effects of BMP4 and red lines  
58 indicate the effects of GREM1. (Figure has been created with [BioRender.com](https://BioRender.com))
